# 1 **Reward Value Is More Important Than Physical Saliency During Bumblebee Visual Search For** 2 **Multiple Rewarding Targets**

3 Vivek Nityananda<sup>1\*</sup> and Lars Chittka<sup>2</sup>

4 1. Behavioural Sciences and Psychology, Biosciences Institute, Newcastle University, Henry  
5 Wellcome Building, Framlington Place, Newcastle Upon Tyne, NE2 4HH, UK.

6 2. School of Biological and Chemical Sciences, Queen Mary University of London, Mile End Road,  
7 Mile End, London, E1 4NS, UK.

8 \* Corresponding author

9 Email: [vivek.nityananda@newcastle.ac.uk](mailto:vivek.nityananda@newcastle.ac.uk)

10 Ph: +441912086246

11 Orcid ID: 0000-0002-2878-2425

## 12 **Abstract**

13 Several animals, including bees, use visual search to distinguish targets of interest and ignore  
14 distractors. While bee flower choice is well studied, we know relatively little about how they choose  
15 between multiple rewarding flowers in complex floral environments. Two important factors that could  
16 influence bee visual search for multiple flowers are the physical saliency (colour contrast against the  
17 background) of flowers and the reward value associated with them. We here investigated how these two  
18 different factors contribute to bee visual search. We trained bees to independently recognize two  
19 rewarding colours that in different experiments differed in either physical saliency, reward value or  
20 both. We then measured their choices and attention to these colours in the presence of distractors in a  
21 test without reinforcement. We found that bees preferred more salient or higher rewarding flowers and  
22 ignored distractors. When the high-reward flowers were less salient than the low-reward flowers, bees  
23 were nonetheless equally likely to choose high-reward flowers. Bees were more also more likely to  
24 attend to these high-reward flowers, with higher inspection times around them and faster search times  
25 when choosing them. When flowers differed in reward, we also found an effect of the training order

26 with low-reward targets being more likely to be chosen if they had been encountered during the more  
27 immediate training session prior to the test. Our results parallel recent findings from humans  
28 demonstrating that reward value can attract attention even when targets are less salient and irrelevant  
29 to the current task.

30 Keywords: Visual Search, Attention, Bee, Flower Constancy, Reward, Saliency

31

32

### 33 **Introduction**

34 Animal foraging behaviour is very well studied, but research in this area has not often considered more  
35 psychological aspects of foraging such as attention and visual search. Adapting human visual search  
36 experiments to investigate visual search in other animals, including bees, has led to an increased  
37 understanding of their foraging behaviour and holds promise to become a productive field of research  
38 (Dukas and Kamil 2001; Bond and Kamil 2002; Spaethe et al. 2006; Morawetz and Spaethe 2012;  
39 Nityananda and Patrick 2013; Ben-Tov et al. 2015; Orłowski et al. 2015, 2018; Saban et al. 2017).  
40 Visual search experiments typically present individuals one target in middle of distractors. Studies have  
41 also looked at how attention is deployed when more than one instance of a target type is present  
42 (Horowitz and Wolfe 2001) or how attention is divided across multiple tasks (Miller 1982). Fewer  
43 studies have looked at visual search for multiple object types or categories that are presented  
44 simultaneously (Duncan 1980; Huang et al. 2007; Kristjánsson et al. 2014; Berggren and Eimer 2020).  
45 Yet in real life we might well be searching for multiple items at a time, such as say, tomatoes and onions  
46 in the supermarket.

47 In bees, studies of visual search have also focussed on how they choose single targets over others, and  
48 we know less about how they search in complex floral environments. In particular, research has  
49 focussed on flower constancy, the tendency of bees to specialize on one flower type (Heinrich 1979;  
50 Wells and Wells 1983; Waser 1986; Hill et al. 1997). A prominent explanation of flower constancy is  
51 that it is a result of a cognitive limitation (Waser 1986; Raine and Chittka 2007), suggesting that bees  
52 cannot simultaneously choose multiple flower types. This view has been challenged by recent work  
53 showing that if bees are given the opportunity to learn multiple rewarding flower types, they readily  
54 approach both types, flexibly switching between the two (Nityananda and Patrick 2013). In fact, they  
55 appear to be able to learn several different target types and this ability is reflected by changes in the  
56 neural structures in their brains (Li et al. 2017). Bees can thus clearly select multiple flowers  
57 simultaneously, but we still do not know the factors influencing their choices between these flowers.

58 In humans, several factors are known to influence visual search (Wolfe and Horowitz 2004; Wolfe  
59 2020), but two broad processes have typically been identified as fundamental. These are often classified

60 as bottom-up and top-down visual search (Johnson and Proctor 2004). Bottom-up processes involve an  
61 involuntary, rapid capture of visual attention by physically salient stimuli. Top-down processes are  
62 more deliberate and guided by the goals of an immediate task. More recently, a third category of  
63 processes has been proposed involving the influence of search history (Anderson et al. 2011a; Awh et  
64 al. 2012; Anderson 2019; Theeuwes 2019). The most prominent examples of these processes have  
65 focussed on the role of reward value (Anderson et al. 2011a, b). Target stimuli that are relevant or  
66 monetarily rewarding in one task have been shown to capture visual attention even when they are  
67 irrelevant to a subsequent task and not physically salient (Anderson et al. 2011b; Bourgeois et al. 2017;  
68 Bucker and Theeuwes 2017). The capture of visual attention in these cases is also involuntary and  
69 rapid, as is typically seen in response to physically salient stimuli. Thus, visual search and attention can  
70 be influenced by three different processes dependent on physical saliency, current goals and search  
71 history.

72 The physical saliency of flowers as measured by their colour contrast against the background influences  
73 flower choice in bees (Lunau 1990; Lunau et al. 1996; Goulson 2000) and would also be expected to  
74 influence visual search and attention. Goal-driven visual search is more difficult to study in bees given  
75 the impossibility of providing verbal instructions to set goals for them. One way of specifying targets  
76 for the bees is to reward certain targets compared to others and reward value (sucrose concentration)  
77 does influence flower choice in bees (Benard et al. 2006; Avarguès-Weber and Giurfa 2014). However,  
78 this better resembles reward-based visual search than goal-directed search. Both reward and physical  
79 saliency could therefore influence visual search in bees. A bee might, however, simultaneously  
80 encounter flowers with differing saliency and reward and it is not yet known how these different factors  
81 could interact and influence visual search. In this study, we therefore ran a series of experiments to test  
82 how saliency and reward influence bee visual search for two simultaneously rewarding target types.

## 83 **Methods**

### 84 *Bees*

85 We obtained the bees from a commercial supplier (Syngenta Bioline, Weert, The Netherlands) and

86 tagged them with Opalith number tags (Christian Graze KG, Weinstadt-Endersbach, Germany) to allow  
87 for individual identification. The bee colonies were transferred under red light to one chamber of a two-  
88 chambered wooden nest box (28×16×11 cm length × width × height). The floor of the other chamber  
89 was covered with cat litter to give bees an area to discard refuse. The nest box was connected through  
90 a 24.5 cm long transparent Perspex tunnel to an arena consisting of a wooden box (100×60×40 cm  
91 length × width × height) covered with a UV-transparent Plexiglas lid. The bees could enter this arena  
92 to forage for sucrose solution. The floor of the arena was covered with green card and the illumination  
93 was provided from above using two twin lamps (TMS 24 F with HF-B 236 TLD (4.3 kHz) ballasts;  
94 Philips, The Netherlands) fitted with Activa daylight fluorescent tubes (Sylvania, New Haven, UK).  
95 Pollen was provided directly into the colony on alternate evenings.

#### 96 *Spectral Measurements*

97 We measured the reflectance spectra of the artificial flowers using an Avantes AvaSpec 2048  
98 spectrophotometer (Anglia Instruments Limited, Soham, UK) with a deuterium-halogen light source,  
99 relative to a BaSO<sub>4</sub> white standard. To account for the difference between spectral sensitivity in humans  
100 and bees, we converted the spectra of the targets into a bee-specific hexagonal colour space (Chittka  
101 1992) incorporating the spectral sensitivity of bumblebee photoreceptors (Skorupski et al. 2007) , the  
102 spectral reflectance of the background and the spectral distribution of the lights used. The colour  
103 hexagon has three vertices corresponding to maximal excitation of each of the bee photoreceptors,  
104 which are tuned to green, blue and ultraviolet (UV) light (Chittka 1992). Three further vertices  
105 correspond to colour mixtures resulting from approximately equal excitation of two spectral receptors.  
106 The Euclidean distance between the centre of the hexagon and each of these vertices is 1 and colour  
107 distances greater than 0.1 are well distinguished by bees without special training procedures (Dyer and  
108 Chittka 2004a). Once plotted in this colour space (Fig 1), the colour loci can be used to calculate the  
109 distances in colour space between pairs of colours, thus indicating the perceptual discriminability of the  
110 colours. All measures of colour differences between the artificial flowers used in our experiments are  
111 provided in Table S1.

#### 112 *Pretraining*

113 We trained colour-naïve foraging bees to forage from square transparent Perspex chips (side: 25 mm,  
114 thickness: 5 mm) that served as artificial flowers (henceforth “flowers”). Each flower had a well in the  
115 centre into which rewarding (sucrose solution) or non-rewarding (water) liquids could be placed. After  
116 bees learned to approach these flowers, we placed them on glass vials (4 cm tall, 1.5 cm in diameter)  
117 and trained the bees to feed from them when they were arranged in a 6 X 4 horizontal grid, with vials  
118 placed 15 cm apart. In this grid, twelve randomly chosen flowers had 12  $\mu$ l of 50% sucrose on them and  
119 the others remained empty. The positions of rewarding and non-rewarding flowers in all experiments  
120 were determined using the random number generator function RAND() in Microsoft Excel®. Once the  
121 bees had foraged on this grid for three bouts, we commenced training.

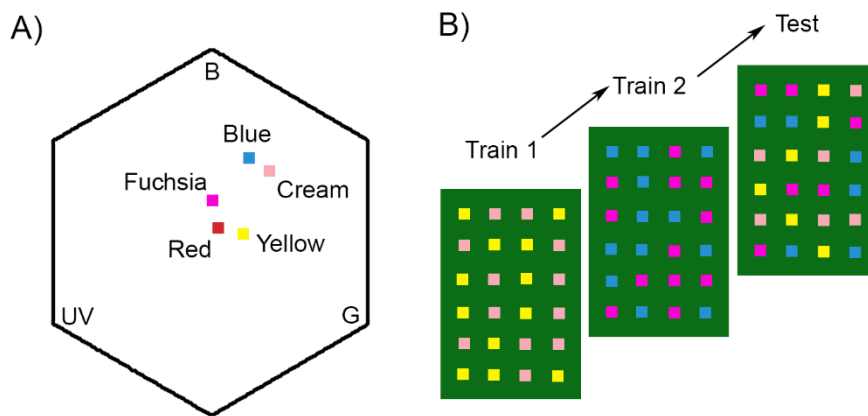

122

123 **Fig. 1.** A) Colour loci of the artificial flowers used across all experiments in the colour hexagon. Three  
124 of the vertices correspond to maximum excitation of the bumblebee photoreceptors sensitive to  
125 ultraviolet (UV), blue (B) and green (G). The angular distance from the centre represents the hue as  
126 perceived by the bee. Distances between points indicate the hue discriminability. The distance between  
127 the centre and any vertex is 1 and colours that differ by distances above 0.1 are easily distinguishable.  
128 B) Example training and test protocol used in the experiments. Bees were trained on one rewarding and  
129 one non-rewarding colour in each training session (Train 1 and Train 2) and tested without  
130 reinforcement with all four colours in the test session (Test).

131

132 **Training**

133 In each experiment we trained bees from three different colonies on two visual discrimination tasks.  
134 The tasks involved bees having to discriminate target flowers of one colour from distractor flowers of  
135 another colour. The flowers consisted of coloured Perspex chips placed in a grid as described above.  
136 The 12 target and 12 distractor flowers were placed in positions on the grid that were randomly chosen  
137 for each bout of the training. Target flowers held 12  $\mu$ l of sucrose solution, while distractor flowers held  
138 12  $\mu$ l of distilled water. Flowers were not refilled during a given training bout. Each bee was  
139 individually trained on one of these tasks until it reached a success criterion of 80% correct choices out  
140 of the last 20 choices made. Choices were recorded when the bee probed the flowers for reward and  
141 bees could revisit flowers in all experiments. Between training bouts, we cleaned the flowers with 99%  
142 ethanol to remove scent markings, and subsequently with water to remove any traces of ethanol.

143 Once a bee successfully completed one training task, it was presented with another task consisting of  
144 target and distractor flowers with different colours from those in the first task. The order in which each  
145 of these tasks were presented was alternated between bees. The exact details of the colours and reward  
146 used are given below. Bees thus sequentially learnt two different rewarding colours.

147 *Experiment 1: How does physical saliency influence bee visual search?*

148 In this experiment, twenty bees were trained on one physically salient target and one less salient target  
149 in separate discrimination tasks. For ten of these bees, one of the two tasks had Blue as the rewarding  
150 colour and Cream as the non-rewarding colour. The other task had Fuchsia as the rewarding colour and  
151 Red as the non-rewarding colour. Both target colours provided a reward of 50% sucrose solution (v/v).  
152 The experiment was replicated with another ten bees using a different set of colours. In this replication,  
153 the rewarding colours were Fuchsia and Red, while the distractors were Cream and Yellow respectively.  
154 This replication ensured that Fuchsia, the less salient colour (compared to Blue) in the first combination  
155 was the more salient colour (compared to Red) in the second combination of colours (Fig 1).

156 *Experiment 2: How does reward value influence bee visual search?*

157 In this experiment, 15 bees were trained on one high-reward target and one low-reward target in separate  
158 discrimination tasks. One of these tasks had Blue as the rewarding colour and Fuchsia as the non-

159 rewarding colour. The other had Cream as the rewarding colour and Yellow as the non-rewarding  
160 colour. These colours were chosen as the Blue and Cream colours were close in physical saliency,  
161 defined as colour contrast with the background (Table S1). In the two discriminations tasks, one of the  
162 target colours had a reward of 50% Sucrose solution (v/v) while the other had a reward of 30% Sucrose  
163 solution (v/v). With one exception, the association of high and low rewards with each of the target  
164 colours (Blue and Cream) was counterbalanced across all trials as was the order in which bees  
165 experienced high and low reward in their two training tasks.

### 166 *Experiment 3: How does bee visual search combine reward value and physical saliency?*

167 In this experiment 16 bees were trained on two discrimination tasks. One of these had a high-reward  
168 target offering a reward of 50% Sucrose solution (v/v). This target was Yellow in colour and had low  
169 colour contrast (i.e. physical saliency) against the background. The distractor in this task was Cream in  
170 colour. In the other task, the target offered a lower reward of 30% Sucrose solution (v/v). The target  
171 was Blue in colour and had a high colour contrast against the background and the distractor was Fuchsia  
172 in colour. The order in which bees encountered each of these tasks was counterbalanced.

### 173 *Test*

174 In all experiments, once training was completed, we tested bees on their visual search when faced with  
175 multiple targets. We presented the bees with six flowers each of the two rewarding colours they were  
176 trained on and six flowers of each of the distractor colours. All flowers in the test were non-rewarding  
177 containing 12  $\mu$ l of distilled water. This prevented reinforcement learning during the test. We noted the  
178 choices made by the bees and the order they were made in. The foraging bout of each bee during the  
179 test was recorded using a Sony DCR-SR58E Handycam to enable later analysis of the times between  
180 the choices. We ran the tests until five minutes were over, or the bee returned to the colony after making  
181 at least 12 choices, whichever occurred sooner.

### 182 *Data Analysis*

183 For all experiments, we split the choices made by the bees into the different transitions between colours  
184 and noted which were switches to different colours and which were constant transitions. We examined



185 the number of constant transitions made before each switch to measure how often bees had runs of  
186 constant choices. We then calculated a sequence index for each bee by dividing the number of constant  
187 transitions by the total number of transitions (Heinrich 1979). This index is the probability of constant  
188 transitions compared to switches. An index close to 1 would indicate that the bees were flowers constant  
189 while a value close to 0.5 would indicate that bees switched flowers with every new choice. We used a  
190 Wilcoxon rank sum test ( $\alpha=0.05$ ) to compare the observed number of constant choices with the index  
191 values of 1 and 0.5. We also examined how quickly bees made these different choices by comparing  
192 the median times taken to make constant choices and switches using Wilcoxon rank sum tests ( $\alpha=0.05$ ).  
193 Since the bees occasionally flew around the arena for extended periods of time without making a choice,  
194 we ran an outlier analysis for the times within each category, and excluded data points that were greater  
195 or less than 1.5 times the interquartile range prior to the second analysis. Timing data is missing for one  
196 bee in Experiment 1 and five bees in Experiment 2 because of the lack of video recordings.

197 To examine how different factors influenced the proportions of choices made by the bees we ran  
198 generalized linear models with the proportion of choices as a dependent variable and the different  
199 factors as independent variables. For experiment 1, the independent variables were physical saliency  
200 (high or low) and second variable representing the training order. This second variable was a binary  
201 variable representing whether the bee first encountered the high saliency target or the low saliency target  
202 during the training on visual discrimination tasks. For experiment 2, the independent variables were  
203 reward value (high or low) and a second binary variable representing whether the bee first encountered  
204 the high reward target or the low reward target during training. For experiment 3, we also had the two  
205 independent variables as in experiment 2. In all the models, bee identity was modelled as a random  
206 variable and the proportion of choices were modelled as a binomial distribution with a logit link  
207 function. We ran models looking for main effects of the independent variables and interaction effects  
208 between the variables as well. In this and all other analyses, models were compared using the Akaike  
209 Information Criterion (AIC) and the model with the lowest criterion was chosen. The significance of  
210 each variable was compared against an  $\alpha$  of 0.05.

211 In experiment 3, we were also interested to see if higher reward could influence bee attention to a target

212 with low physical saliency. We used the positions of the bee during visual search as a proxy for  
213 attention. Using the open-source program Tracker (V5.15, ©2020 Douglas Brown,  
214 [physlets.org/tracker](https://physlets.org/tracker)), we perspective corrected each video and tracked the position of the bee in each  
215 frame of the video recording during the test phase. We used this to analyse bee behaviour during the  
216 first two minutes of the videos. Frames in which it was not possible to spot the bee – either because it  
217 flew to the corner of the arena or due to reflections of the lighting- were labelled as missing data. Using  
218 the tracked positions of the bees we obtained a map of search behaviour for each bee. We specified  
219 zones on these maps corresponding to flower areas and non-flower areas. Flower areas were areas  
220 within 2 cm of the flowers. All other areas were non-flower areas. We measured inspection time as the  
221 time each bee spent in each of these areas by summing the number of video frames in which bees were  
222 present in them and multiplying this by the frame rate (25 frames per second). We compared the  
223 inspection time for the different types of targets and distractors. We used a generalized linear model to  
224 model this as a binomial variable with a logit link function. As in the analysis above we used reward  
225 value, physical saliency and search history as independent variables and bee identity as a random factor.  
226 We ran models looking for main effects of the independent variables and for interaction effects between  
227 the variables as well.

228 All statistical analyses were run in RStudio (version 1.2.5033)

## 229 **Results**

### 230 *Experiment 1: How does physical saliency influence bee visual search?*

231 The average time taken for the first and second training bouts on this experiment was 2080.7 ( $\pm$  1418)  
232 seconds and 971.9 ( $\pm$  366.4) seconds respectively.

233 Combining results from both flower sets we found that the average proportion of salient target flowers  
234 chosen during tests was 0.58 ( $\pm$  0.13 S.D.) and the average proportion of equally rewarding non-salient  
235 targets chosen was 0.37 ( $\pm$  0.11 S.D.). The average proportion of distractors chosen was 0.06 ( $\pm$  0.08  
236 S.D.). If bees chose equally between the two targets without choosing any distractors, we would expect  
237 an equal proportion (0.5) of both salient and non-salient targets to be chosen. Saliency had a significant

238 effect on the proportion of targets chosen; the proportion of high-saliency targets chosen was  
239 significantly greater than the proportion of non-salient targets chosen (GLMM, Effect size estimate: -  
240 0.84,  $P = 4.3 * 10^{-9}$ , Fig 2A) and the proportion of distractors chosen (GLMM, Effect size estimate = -  
241 3.24,  $P < 2 * 10^{-16}$ ). The low number of choices made to distractors demonstrates that the bees had  
242 memorised both types of previously rewarding targets in the training bouts and could recall them in the  
243 presence of distractors. The best model that described the data did not include the effect of training  
244 order indicating that this was not an important determinant of the proportion of salient targets chosen.

245

246 The average sequence index of the bees was 0.51 ( $\pm 0.17$  S.D.). An index close to 0.5 indicates equal  
247 numbers of constant choices and switches, while an index close to 1 indicates complete flower  
248 constancy with no switches. This index was not significantly different from 0.5 (Wilcoxon rank sum  
249 test,  $W = 200$ ,  $P = 0.1$ ), showing that the bees were equally likely to make constant choices and switches  
250 (Fig 3). The times taken for choices between like flowers and transitions between flower types were not  
251 significantly different (Wilcoxon rank sum test,  $W = 13036$ ,  $P = 0.14$ ). The mean time taken for constant  
252 choices was 7.53 ( $\pm 4.93$  S.D.) seconds compared to a mean of 9.03 ( $\pm 7.05$  S.D.) seconds for switches  
253 (Fig 4A).

254

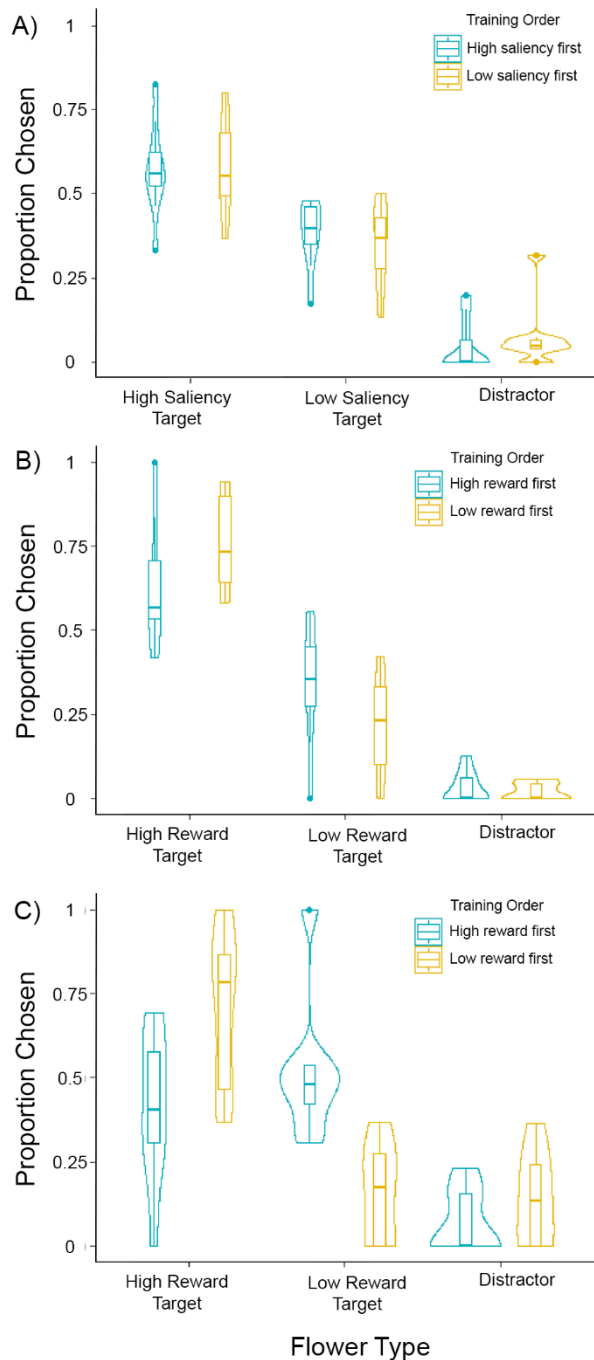

272

273 **Fig. 2:** Proportions of different flower types chosen in A) Experiment 1, B) Experiment 2, and C)

274 Experiment 3. Box plots depict the median and the first and third quartiles, the whiskers depict the

275 largest and smallest values that are within 1.5 times the interquartile range from the edge of the boxes.

276 Violin plots overlaid on top of the box plot depict the mirrored density plots of the data.

277

278 *Experiment 2: How does reward value influence bee visual search?*

279 The average time taken for the first and second training bouts on this experiment was 1033.8 ( $\pm$  439.8)  
280 seconds and 958.7 ( $\pm$  493.4) seconds respectively.

281 The average proportion of high-reward targets chosen by bees was 0.69 ( $\pm$  0.18 S.D.), while the average  
282 proportion of low reward targets chosen was 0.28 ( $\pm$  0.17 S.D.). The best model for the proportion of  
283 choices included an interaction between the reward value and the order of the training. Higher reward  
284 value (50% Sucrose) led to significantly greater proportion of choices compared to both low reward  
285 value (30% Sucrose) flowers (GLM, effect size estimate: -1.12,  $P = 2.15 \times 10^{-5}$ , Fig 2B) and distractors  
286 (GLM, effect size estimate: -3.65,  $P = 1.18 \times 10^{-13}$ ). Thus, bees chose high-reward targets more often  
287 than low-reward targets. The average proportion of choices made to distractors was 0.02 ( $\pm$  0.04 S.D.),  
288 demonstrating that the bees were capable of simultaneously choosing between two targets even in the  
289 presence of distractors.

290 Bees that were first trained on high-reward targets chose these targets significantly less than if they  
291 were first trained on low-reward targets (GLMM, effect size estimate: 0.72,  $P = 0.0088$ ). There was  
292 also a significant interaction effect between training order and reward value (GLMM, effect size  
293 estimate: -1.38,  $P = 0.00041$ ). Bees were thus more likely to choose high-reward targets if they had been  
294 trained on them in the bout immediately preceding the test (i.e. trained on the low-reward targets first,  
295 yellow/right vs blue/left plots in Fig 2B). The training times between the end of the first bout and the  
296 start of the test were, however, not significantly different when the first training bout had targets of high  
297 or low reward value (Wilcoxon rank sum test,  $W = 29$ ,  $P = 0.57$ ). The interaction effect between training  
298 order and reward value is thus not due to difference in training times.

299 The average sequence index of the bees was 0.69 ( $\pm$  0.20 S.D.) and this was significantly different from  
300 0.5 (Wilcoxon rank sum test,  $W = 187.5$ ,  $P = 0.0008$ , Fig 3). This indicates that in this experiment bees  
301 were more likely to have constant choices than switches. The time taken between choices was also  
302 significantly different between constant choices and switches chosen (Wilcoxon rank sum test,  $W =$   
303 2661.5,  $P = 0.01$ , Fig 4B). The mean time taken for constant choices was 6.49 ( $\pm$  3.63 S.D.) seconds  
304 compared to a mean of 8.47 ( $\pm$  4.88 S.D.) seconds for switches.

305

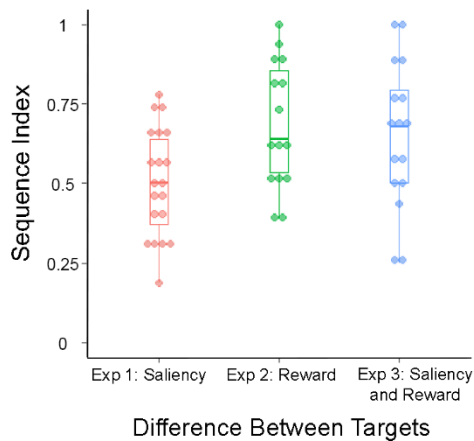

306

307 **Fig. 3.** Sequence indices in each of the experiments. Box plots as described for Figure 2. The actual  
308 data points are overlaid on top of the box plot.

309 *Experiment 3 How does bee visual search combine reward value and physical saliency?*

310 The average time taken for the first and second training bouts on this experiment was 1884.5 ( $\pm$  993)  
311 seconds and 1681.1 ( $\pm$  815.3) seconds respectively.

312 The average proportion of high-reward, low-saliency targets chosen by bees was 0.56 ( $\pm$  0.27 S.D.),  
313 while the average proportion of low-reward, high-saliency targets chosen was 0.34 ( $\pm$  0.26 S.D.). There  
314 was no significant main effect of reward value on the proportion of high and low reward targets chosen  
315 (GLM, effect size estimate: 0.32,  $P$  = 0.23, Fig 2C) but a significantly higher proportion of high reward  
316 targets were chosen compared to distractors (GLMM, effect size estimate: -2.42,  $P$  =  $2.55 \times 10^{-8}$ ). Thus,  
317 bees chose high-reward targets as often as low-reward targets, despite their lower saliency. The average  
318 proportion of choices made to distractors was low at 0.10 ( $\pm$  0.12 S.D.), demonstrating that the bees  
319 were capable of simultaneously choosing between two targets even in the presence of distractors.

320 The order in which bees were trained on the high-reward and low-reward targets had a significant main  
321 effect (GLM, effect size estimate: 1.1654,  $P$  =  $2.01 \times 10^{-5}$ ). There was also a significant interaction  
322 effect between reward value and the order of the training (GLM, effect size estimate: -2.8688,  $P$  =  $3.39$   
323  $\times 10^{-12}$ ). Bees were thus more likely to choose high-reward targets if they were the targets in the second

324 training session (immediately prior to the test) rather than in the first training session.

325 The training times between the end of the first bout and the start of the test were however not  
326 significantly different when the first training bout had targets of high or low reward value (Wilcoxon  
327 rank sum test,  $W = 31$ ,  $P = 0.78$ ). The interaction effect between training order and reward value is thus  
328 not due to difference in training times.

329 The average sequence index of the bees was  $0.65 (\pm 0.25 \text{ S.D.})$  and this was significantly different from  
330  $0.5$  (Wilcoxon rank sum test,  $W = 192$ ,  $P = 0.0084$ , Fig 3). This indicates that in this experiment, bees  
331 were more likely to have constant choices than switches. The duration between choosing one flower  
332 and the next was also significantly different between constant choices and switches (Wilcoxon rank  
333 sum test,  $W = 3184$ ,  $P = 0.00053$ , Fig 4C). The mean time taken for constant choices was  $7.14 (\pm 5.36$   
334  $\text{S.D.})$  seconds compared to a mean of  $10.51 (\pm 7.78 \text{ S.D.})$  seconds for switches.

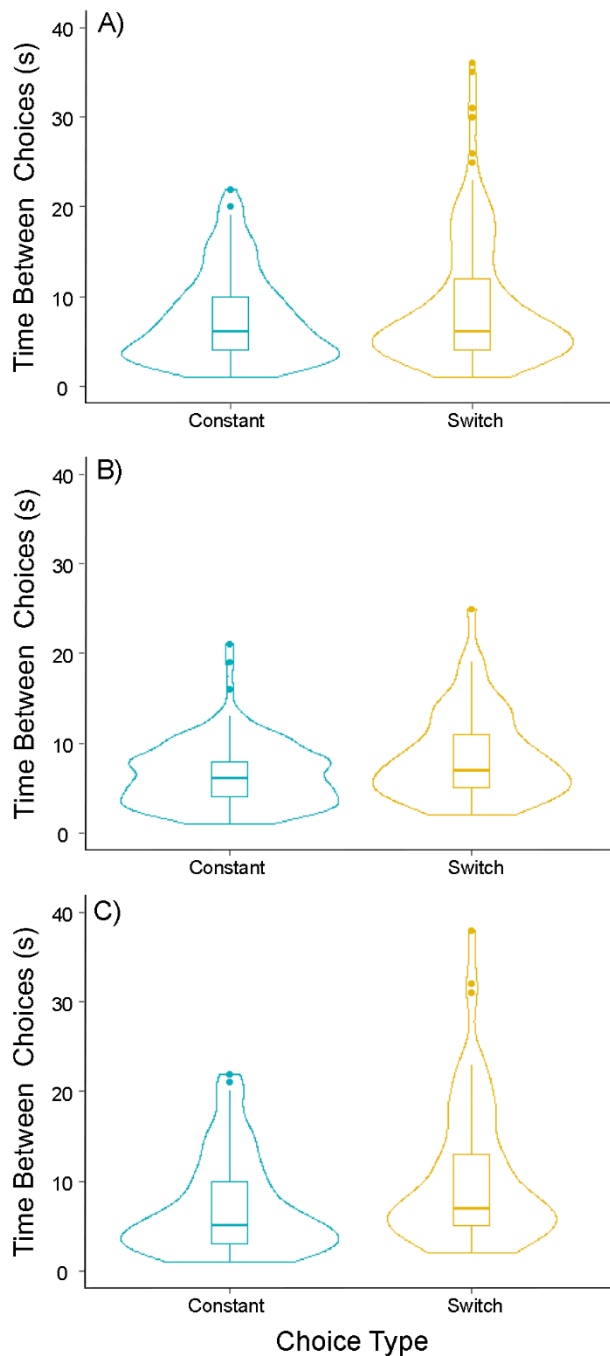

335

336 **Fig. 4:** Time taken to make constant choices and switches in A) Experiment 1, B) Experiment 2, and  
337 C) Experiment 3. Other details as for Figure 2.

338

339 The mean search time spent before choosing a high-reward flower was  $7.07 (\pm 5.15 \text{ S.D.})$  seconds while  
340 the mean search time spent before choosing a low-reward flower was  $9.51 (\pm 7.33 \text{ S.D.})$  seconds, and  
341 these values were significantly different (GLM, Estimate =  $-0.009$ ,  $P=0.009$ ). Thus, the bees were



342 quicker to choose high-reward targets compared to low reward targets. The model that best explained  
343 the proportion of time bees spent in different zones in the arena included flower type and the order in  
344 which bees were trained on high or low reward flowers as factors. Bees spent a significantly greater  
345 proportion of time inspecting higher rewarding flowers than lower rewarding flowers with greater  
346 physical saliency (GLMM, effect size estimate = -0.63,  $P < 2 * 10^{-16}$  Fig 5A) and distractors (GLMM,  
347 effect size estimate = -2.14,  $P < 2 * 10^{-16}$ ). There was also a significant main effect of the order in which  
348 bees were trained on high or low reward flowers (GLMM, effect size estimate = 0.84,  $P < 2 * 10^{-16}$ ) as  
349 well as an interaction effect between flower type and the order of training (GLMM, effect size estimate  
350 = -2.28,  $P < 2 * 10^{-16}$ ). Thus, when bees were trained on the high reward flowers first and the low-  
351 reward flowers later, they were equally likely to spend time around high-reward, low saliency flowers  
352 and low-reward high-saliency flowers. However, when trained on the low-reward flowers first and the  
353 high-reward flowers later, they spend a greater time around high-reward low saliency flowers compared  
354 to low-reward high-saliency flowers.

355

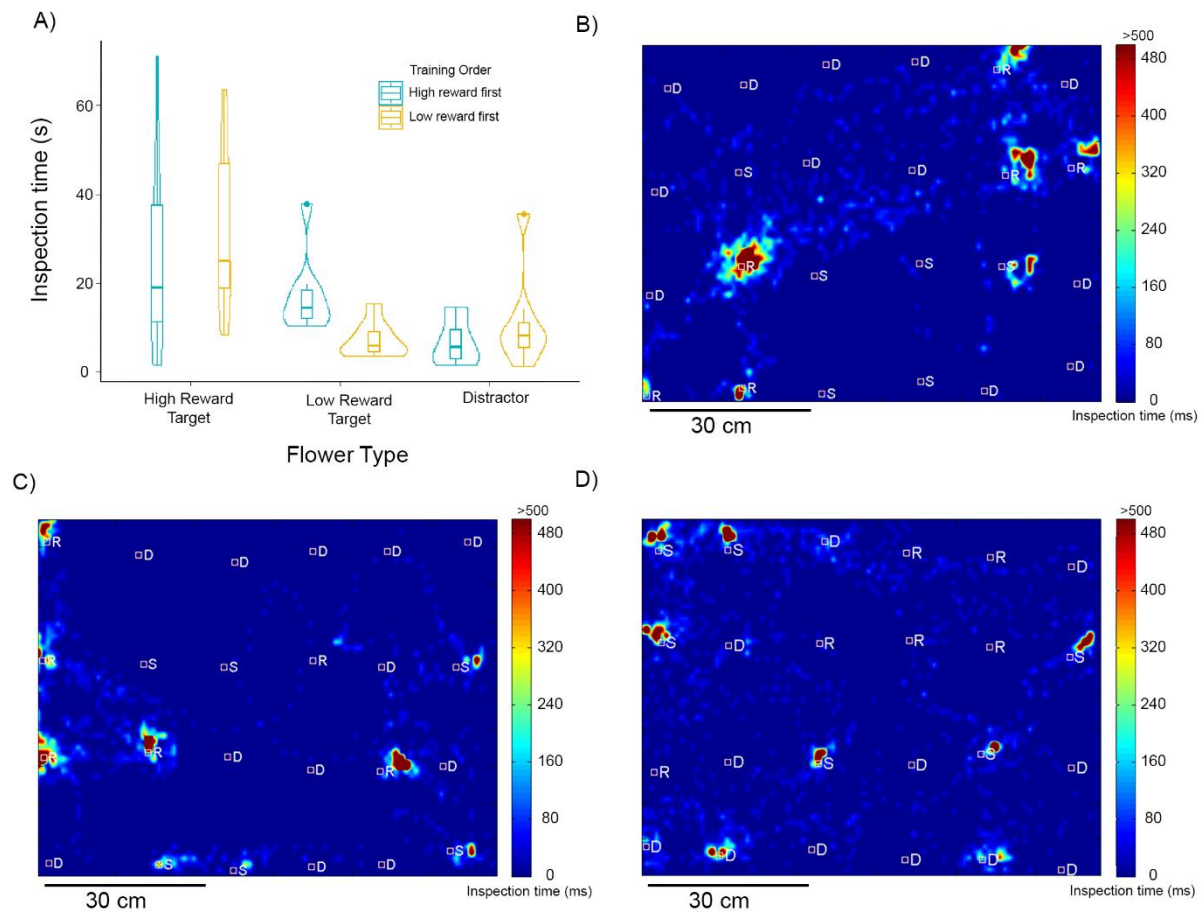

356

357 **Fig. 5.** Inspection times around different flower types. Details for A) as in Figure 2. B-D) Example  
358 visual search maps for three bees depicted as a top view of the flight arena with targets and distractors.  
359 Colours depict the inspection times up to a maximum of 500 ms (only 5% of all times were greater than  
360 this limit). Squares depict flower positions. R = High-reward, low saliency targets; S = Low-reward,  
361 high-saliency targets, D = Distractors. B and C depict examples where bees spent more time around high-  
362 reward targets, D depicts an example where the bee spent more time inspecting low-reward targets.

363

## 364 Discussion

365 Bees trained on multiple targets can choose the targets in the presence of distractors, without staying  
366 flower constant (Nityananda and Patrick 2013). When targets are matched in both saliency and reward,  
367 bees are equally likely to choose either rewarding target, and switch between them often. Our results  
368 here demonstrate how bees prioritize learnt rewarding targets when they differ in physical saliency,

369 reward value or both. We find that differences in saliency and reward value do not hamper the visual  
370 search task and bees are still able to choose at least two target types and ignore distractors. Both saliency  
371 and reward influence the proportion of targets chosen – with more salient and more rewarding targets  
372 chosen in higher proportions. The order in which bees encounter the targets during training matters  
373 when the targets differ in reward value and bees show a recency effect (Ebbinghaus 1885). This is  
374 particularly evident when the targets differ in both saliency and reward value. While bees in this  
375 condition seem to choose high reward low-saliency targets at an equal proportion as low-reward high-  
376 saliency targets, a slightly different pattern is seen when training order is accounted for. Low-reward,  
377 high-saliency targets are more likely to be chosen if they are encountered in the most recent training  
378 bout rather than the earlier training bout. This effect is less pronounced for the high-reward, low saliency  
379 targets. Our results also show that high-reward targets lead to greater flower constancy, shorter times  
380 for constant choices and more time spent attending to these targets.

381 Studies have long shown that bees can differentiate between coloured targets that differ in reward value  
382 (Lubbock 1881; Turner 1910; von Frisch 1914; Benard et al. 2006; Avarguès-Weber and Giurfa 2014).  
383 Most studies, however, have typically used appetitive training paradigms where bees are trained to  
384 distinguish targets with a reward from distractors without a reward (Avarguès-Weber and Giurfa 2014).  
385 More recently, studies have focussed on aversive training paradigms where bees distinguish between  
386 targets that are rewarding and distractors that contain an aversive solution like quinine (Dyer and Chittka  
387 2004b; Giurfa 2004; Avarguès-Weber and Giurfa 2014). These two approaches have different effects  
388 with aversive conditioning leading to more fine-grained colour discrimination (Dyer and Chittka 2004b;  
389 Giurfa 2004). Studies that use two stimuli that are both rewarding but differ in reward value, as in this  
390 study, are fewer but they clearly demonstrate that bees can learn to differentiate colours even in this  
391 paradigm (Baude et al. 2011; Riveros and Gronenberg 2012; Avarguès-Weber et al. 2018). In one study  
392 using harnessed, rather than free-flying bees, the reward differential was provided by either providing  
393 the same concentration of sucrose solution to both the antenna and the proboscis (high reward condition)  
394 or to only the antenna (low reward condition). This differential was sufficient for bees to distinguish  
395 the colours associated with higher reward from those associated with lower rewards (Riveros and

396 Gronenberg 2012). Our results from experiment 1 demonstrates that flowers that have a higher sucrose  
397 concentration are preferred by freely flying bees and bias their visual attention. The results from  
398 experiment 3 further show that flowers previously associated with high reward are still chosen half an  
399 hour after the training, even when they have lower saliency than low reward flowers.

400 The influence of physical saliency or colour contrast on bee visual search is less well studied than the  
401 influence of reward value (but see (Spaethe et al. 2001)). However, some studies have looked at this in  
402 the context of the innate preferences of bees (Lunau 1990; Giurfa et al. 1995; Lunau et al. 1996). These  
403 preferences are typically biased towards the UV-blue spectral range but do not seem to reflect the colour  
404 or green contrast difference from the background (Giurfa et al. 1995). Flower colours that have high  
405 spectral purity against background with low spectral purity do however attract the strongest innate  
406 behavioural responses from bumblebees (Lunau 1990). In addition, while bees can be trained to  
407 overcome their initial biases, their preferences can remain influenced by the effect of innate preferences  
408 (Gumbert 2000). In our experiment 3 we used a blue target as a low reward target to see if the high  
409 reward value of the other target could overcome biases towards this target. We found this to occur if  
410 the bees were trained on the blue targets further in time from the test. Higher reward also biased visual  
411 attention away from the high saliency blue targets as indicated by the time spent by the bees around  
412 different types of flowers.

413 Our results also show that the search history of the bees is important to consider. Bees might often  
414 specialize on the first colour they find to be rewarding – regardless of saliency. This would prevent  
415 them from learning multiple targets as in our study. In fact, other studies have found persistent flower  
416 constancy when bees are not allowed to learn both targets independently (Wells and Wells 1983; Hill  
417 et al. 1997). In nature, multiple targets might possibly be learnt when floral communities are more  
418 diverse or have higher densities of flowers (Heinrich 1979; Gegear and Thomson 2004; Baude et al.  
419 2011). Our results and those of previous papers show that bees can switch between flowers and do not  
420 always stay flower constant. Thus, flower constancy does not stem from a cognitive limitation as has  
421 been suggested before (Waser 1986; Raine and Chittka 2007). Our results further point towards the  
422 importance of reward value for constancy. Bees show greater flower constancy when the targets differed

423 in reward value. In these cases, they also showed shorter times when making constant choices rather  
424 than switching between colours. Bumblebees have been shown to fly shorter distances after visiting  
425 rewarding flowers compared to non-rewarding flowers (Dukas and Real 1993). Our results show that  
426 the experience of different reward values could also influence their foraging behaviour. Bees appear  
427 more likely to switch between flowers that have equal reward value but stay constant to highly  
428 rewarding flowers. Flower constancy is also affected by the density of conspecifics (Baude et al. 2011)  
429 so including this along with reward value and perhaps floral diversity would make for a fuller picture  
430 of the ecology of flower constancy.

431 Reward value also appears to influence the visual attention of the bees in addition to constancy and  
432 choice latencies. Bees spent longer inspecting high-reward flowers compared to low-reward flowers of  
433 greater saliency and were quicker to choose them. This resembles results from the human visual search  
434 literature, especially experiments demonstrating that the reward value associated with a stimulus can  
435 influence reaction times even if the stimulus is not task-relevant or salient (Anderson et al. 2011a, b).  
436 In our experiments we cannot assign task goals to the bees. However, the training order serves as a  
437 proxy for this. Half the bees in experiment 3 were initially trained on the high reward target and then  
438 on the low reward target. When faced with the test, the most recent training could arguably be  
439 considered the relevant task, making the previous high-reward targets irrelevant stimuli. Nonetheless  
440 bees still chose and attended to these targets – paralleling results in human experiments. We might  
441 potentially see different results when the reward values are lower, or the contrast of the high reward  
442 target is reduced even further. When high-reward targets have very low detectability, low-reward targets  
443 with high physical saliency could have lower search times. In these cases, bees might then change their  
444 preference to low-reward targets rather than high-reward ones, especially if the rewards are not very  
445 different. It has been argued that reward-based attentional capture in humans arises from Pavlovian  
446 mechanisms, where the level of reward determines the effectiveness of attentional capture (Bucker and  
447 Theeuwes 2017; Mine and Saiki 2018). Since several animals, including bees, are well known for  
448 Pavlovian learning, we should therefore expect this form of attention to be widespread in several  
449 animals. Our results suggest this might be true in bees and more focussed experiments showing that the

450 mechanisms of attentional capture are shared in bees and humans would be an exciting area for future  
451 research.

452

453 **Acknowledgements:** VN is funded by a Biotechnology and Biological Sciences Research Council  
454 David Phillips Fellowship BB/S009760/1 and this work was partly carried out with support from a  
455 Marie Curie Incoming International Fellowship (PIIF-GA-2009-253593). We thank Sara Khan,  
456 Muhammad Sayyidul Hasan and Piranavan Selvaratnam for help with running the experiments.

457

458 **References:**

459 Anderson BA (2019) Neurobiology of value-driven attention. *Curr Opin Psychol* 29:27–33.

460 <https://doi.org/10.1016/j.copsyc.2018.11.004>

461 Anderson BA, Laurent PA, Yantis S (2011a) Value-driven attentional capture. *Proc Natl Acad Sci*.

462 <https://doi.org/10.1073/pnas.1104047108>

463 Anderson BA, Laurent PA, Yantis S (2011b) Learned value magnifies salience-based attentional

464 capture. *PLoS One* 6:e27926. <https://doi.org/10.1371/journal.pone.0027926>

465 Avarguès-Weber A, Giurfa M (2014) Cognitive components of color vision in honey bees: How

466 conditioning variables modulate color learning and discrimination. *J Comp Physiol A*

467 *Neuroethol Sensory, Neural, Behav Physiol* 200:449–461. [https://doi.org/10.1007/s00359-014-](https://doi.org/10.1007/s00359-014-0909-z)

468 0909-z

469 Avarguès-Weber A, Lachlan R, Chittka L (2018) Bumblebee social learning can lead to suboptimal

470 foraging choices. *Anim Behav* 135:209–214. <https://doi.org/10.1016/j.anbehav.2017.11.022>

471 Awh E, Belopolsky A V., Theeuwes J (2012) Top-down versus bottom-up attentional control: a failed

472 theoretical dichotomy. *Trends Cogn Sci* 16:437–43. <https://doi.org/10.1016/j.tics.2012.06.010>

473 Baude M, Danchin É, Mugabo M, Dajoz I (2011) Conspecifics as informers and competitors: An

- 474 experimental study in foraging bumble-bees. *Proc R Soc B Biol Sci* 278:2806–2813.  
475 <https://doi.org/10.1098/rspb.2010.2659>
- 476 Ben-Tov M, Donchin O, Ben-Shahar O, Segev R (2015) Pop-out in visual search of moving targets in  
477 the archer fish. *Nat Commun* 6:6476. <https://doi.org/10.1038/ncomms7476>
- 478 Benard J, Stach S, Giurfa M (2006) Categorization of visual stimuli in the honeybee *Apis mellifera*.  
479 *Anim Cogn* 9:257–70. <https://doi.org/10.1007/s10071-006-0032-9>
- 480 Berggren N, Eimer M (2020) Attentional access to multiple target objects in visual search. *J Cogn*  
481 *Neurosci* 32:283–300
- 482 Bond AB, Kamil AC (2002) Visual predators select for crypticity and polymorphism in virtual prey.  
483 *Nature* 415:609–13. <https://doi.org/10.1038/415609a>
- 484 Bourgeois A, Neveu R, Bayle DJ, Vuilleumier P (2017) How does reward compete with goal-directed  
485 and stimulus-driven shifts of attention? *Cogn Emot* 31:109–118.  
486 <https://doi.org/10.1080/02699931.2015.1085366>
- 487 Bucker B, Theeuwes J (2017) Pavlovian reward learning underlies value driven attentional capture.  
488 *Attention, Perception, Psychophys* 79:415–428. <https://doi.org/10.3758/s13414-016-1241-1>
- 489 Chittka L (1992) The colour hexagon: a chromaticity diagram based on photoreceptor excitations as a  
490 generalized representation of colour opponency. *J Comp Physiol A* 170:533–543
- 491 Dukas R, Kamil AC (2001) Limited attention: the constraint underlying search image. *Behav Ecol*  
492 12:192–199. <https://doi.org/10.1093/beheco/12.2.192>
- 493 Dukas R, Real LA (1993) Effects of recent experience on foraging decisions in bumblebees.  
494 *Oecologia* 94:244–246
- 495 Duncan J (1980) The locus of interference in the perception of simultaneous stimuli. *Psychol Rev*  
496 87:272–300. <https://doi.org/10.1037/0033-295X.87.3.272>
- 497 Dyer AG, Chittka L (2004a) Biological significance of distinguishing between similar colours in



- 498 spectrally variable illumination: bumblebees (*Bombus terrestris*) as a case study. *J Comp Physiol*  
499 A 190:105–14. <https://doi.org/10.1007/s00359-003-0475-2>
- 500 Dyer AG, Chittka L (2004b) Fine colour discrimination requires differential conditioning in  
501 bumblebees. *Naturwissenschaften* 91:224–227. <https://doi.org/10.1007/s00114-004-0508-x>
- 502 Ebbinghaus H (1885) Über das Gedächtnis. Duncker & Humblot
- 503 Gegear RJ, Thomson JD (2004) Does the Flower Constancy of Bumble Bees Reflect Foraging  
504 Economics? *Ethology* 110:793–805. <https://doi.org/10.1111/j.1439-0310.2004.01010.x>
- 505 Giurfa M (2004) Conditioning procedure and color discrimination in the honeybee *Apis mellifera*.  
506 *Naturwissenschaften* 91:228–231. <https://doi.org/10.1007/s00114-004-0530-z>
- 507 Giurfa M, Nunez J, Chittka L, Menzel R (1995) Colour preferences of flower-naive honeybees. *J*  
508 *Comp Physiol A* 177:247–259
- 509 Goulson D (2000) Are insects flower constant because they use search images to find flowers? *Oikos*  
510 88:547–552. <https://doi.org/10.1034/j.1600-0706.2000.880311.x>
- 511 Gumbert A (2000) Color choices by bumble bees (*Bombus terrestris*): innate preferences and  
512 generalization after learning. *Behav Ecol Sociobiol* 48:36–43.  
513 <https://doi.org/10.1007/s002650000213>
- 514 Heinrich B (1979) "Majoring" and "Minoring" by Foraging Bumblebees, *Bombus Vagans*: An  
515 Experimental Analysis. *Ecology* 60:245–255
- 516 Hill PSMM, Wells PH, Wells H (1997) Spontaneous flower constancy and learning in honey bees as a  
517 function of colour. *Anim Behav* 54:615–27. <https://doi.org/10.1006/anbe.1996.0467>
- 518 Horowitz TS, Wolfe JM (2001) Search for multiple targets: remember the targets, forget the search.  
519 *Percept Psychophys* 63:272–85
- 520 Huang L, Treisman A, Pashler H (2007) Characterizing the limits of human visual awareness. *Science*  
521 (80) 317:823–825. <https://doi.org/10.1126/science.1143515>



- 522 Johnson A, Proctor RW (2004) *Attention*. Sage Publications, Thousand Oaks, California
- 523 Kristjánsson Á, Jóhannesson ÓI, Thornton IM (2014) Common attentional constraints in visual  
524 foraging. *PLoS One* 9:e100752. <https://doi.org/10.1371/journal.pone.0100752>
- 525 Li L, MaBouDi H Di, Egertová M, et al (2017) A possible structural correlate of learning performance  
526 on a colour discrimination task in the brain of the bumblebee. *Proc R Soc B Biol Sci*  
527 284:20171323. <https://doi.org/10.1098/rspb.2017.1323>
- 528 Lubbock SJ (1881) Observations on ants, bees, and wasps. IX. Color of flowers as an attraction to  
529 bees: Experiments and considerations thereon. *Zool J Linn Soc* 16:110–121
- 530 Lunau K (1990) Colour saturation triggers innate reactions to flower signals: Flower dummy  
531 experiments with bumblebees. *J Comp Physiol A* 166:827–834
- 532 Lunau K, Wacht S, Chittka L (1996) Colour choices of naive bumble bees and their implications for  
533 colour perception. *J Comp Physiol A* 178:477–489. <https://doi.org/10.1007/BF00190178>
- 534 Miller J (1982) Divided attention: Evidence for coactivation with redundant signals. *Cogn Psychol*  
535 14:247–279. [https://doi.org/10.1016/0010-0285\(82\)90010-X](https://doi.org/10.1016/0010-0285(82)90010-X)
- 536 Mine C, Saiki J (2018) Pavlovian reward learning elicits attentional capture by reward-associated  
537 stimuli. *Attention, Perception, Psychophys* 80:1083–1095. <https://doi.org/10.3758/s13414-018->  
538 1502-2
- 539 Morawetz L, Spaethe J (2012) Visual attention in a complex search task differs between honeybees  
540 and bumblebees. *J Exp Biol* 215:2515–2523. <https://doi.org/10.1242/jeb.066399>
- 541 Nityananda V, Patrick JG (2013) Bumblebee visual search for multiple learned target types. *J Exp*  
542 *Biol* 216:4154–60. <https://doi.org/10.1242/jeb.085456>
- 543 Orłowski J, Beissel C, Rohn F, et al (2015) Visual pop-out in barn owls: Human-like behavior in the  
544 avian brain. *J Vis* 15:1–13. <https://doi.org/10.1167/15.14.4>.doi
- 545 Orłowski J, Ben-Shahar O, Wagner H, et al (2018) Visual search in barn owls : Task difficulty and

- 546 saccadic behavior. *J Vis* 18:1–13. <https://doi.org/10.1167/18.1.4>.
- 547 Raine NE, Chittka L (2007) Flower Constancy and Memory Dynamics in Bumblebees (  
548 Hymenoptera : Apidae : *Bombus* ). *Entomol Gen* 29:179–199
- 549 Riveros AJ, Gronenberg W (2012) Decision-making and associative color learning in harnessed  
550 bumblebees (*Bombus impatiens*). *Anim Cogn* 15:1183–93. [https://doi.org/10.1007/s10071-012-](https://doi.org/10.1007/s10071-012-0542-6)  
551 0542-6
- 552 Saban W, Sekely L, Klein RM, Gabay S (2017) Endogenous orienting in the archer fish. *Proc Natl*  
553 *Acad Sci* 114:7577–7581. <https://doi.org/10.1073/pnas.1700574114>
- 554 Skorupski P, Döring TF, Chittka L (2007) Photoreceptor spectral sensitivity in island and mainland  
555 populations of the bumblebee, *Bombus terrestris*. *J Comp Physiol A Neuroethol Sensory,*  
556 *Neural, Behav Physiol* 193:485–494. <https://doi.org/10.1007/s00359-006-0206-6>
- 557 Spaethe J, Tautz J, Chittka L (2001) Visual constraints in foraging bumblebees: flower size and color  
558 affect search time and flight behavior. *Proc Natl Acad Sci U S A* 98:3898–903.  
559 <https://doi.org/10.1073/pnas.071053098>
- 560 Spaethe J, Tautz J, Chittka L (2006) Do honeybees detect colour targets using serial or parallel visual  
561 search? *J Exp Biol* 209:987–993. <https://doi.org/10.1242/jeb.02124>
- 562 Theeuwes J (2019) Goal-driven, stimulus-driven, and history-driven selection. *Curr Opin Psychol*  
563 29:97–101. <https://doi.org/10.1016/j.copsyc.2018.12.024>
- 564 Turner CH (1910) Experiments on color-vision of the honey bee. *Biol Bull* 18:257–279.  
565 <https://doi.org/10.1086/bblv18n5p213>
- 566 von Frisch K (1914) Der Farbensinn und Formensinn der Biene. *Zool Jahrb Abt Allg Zool Physiol*  
567 *Tiere* 37:1–238
- 568 Waser NM (1986) Flower Constancy: Definition, Cause, and Measurement. *Am Nat* 127:593–603
- 569 Wells H, Wells PH (1983) Honey Bee Foraging Ecology : Optimal Diet , Minimal Uncertainty or

570 Individual Constancy ? J Anim Ecol 52:829–836

571 Wolfe JM (2020) Visual Search: How Do We Find What We Are Looking For? Annu Rev Vis Sci

572 6:1–24

573 Wolfe JM, Horowitz TS (2004) What attributes guide the deployment of visual attention and how do

574 they do it? Nat Rev Neurosci 5:495–501. <https://doi.org/10.1038/nrn1411>

575

576

577

578
